# Supplementary material for: Food security and small holder farming in Pacific Island countries and territories: A scoping review
Source: PLOS journal article supplement (doi:10.1371/journal.pstr.0000009), 2022-04-11
Supplement: S1 (10.1371/journal.pstr.0000009.s001) [file journal.pstr.0000009.s001]

|  | S1 Appendix: Table of Studies — Part A Peer Reviewed Literature | |  |  |
| --- | --- | --- | --- | --- |
|  |  |  |  |  |
| **No.** | **Author** | **Title** | **Org/Journal** | **Year** |
| 1 | H. Jones and K. Charlton | A cross-sectional analysis of cost and affordability of achieving recommended intakes of non-starchy fruits and vegetables (NSFV) in the capital of Vanuatu | BMC Public Health | 2015 |
| 2 | V. Lebot and P. Simeoni | Community Food Security: Resilience and Vulnerability in Vanuatu | Human Ecology | 2015 |
| 3 | P. Kaoh et al. | More resilient cropping systems for food security & livelihoods in the Pacific Islands | Acta Horticulturae | 2016 |
| 4 | M. MacCarthy | Playing Politics with Yams: Food Security in the Trobriand Islands of PNG | The Journal of Culture & Agriculture | 2012 |
| 5 | O. Mertz et al. | Changes in shifting cultivation systems on Small Pacific Islands | The Geographical Journal | 2012 |
| 6 | D. Paulson and S. Rogers | Maintaining Subsistence security in Western Samoa | Geoforum | 1997 |
| 7 | H. Thompson | Subsistence Agriculture in PNG | Journal of Rural Studies | 1986 |
| 8 | R. Thaman | Urban Food Gardening in the Pacific Islands: A basis for food security in rapidly urbanising Small-Island States | Habitat International | 1995 |
| 9 | V. Iese et al. | Facing food security risks: the rise and rise of the sweet potato in the Pacific Islands | Global Food Security | 2018 |
| 10 | G. Koczberski et al. | Diffusing Risk and Building Resilience through Innovation: Reciprocal Exchange Relationships, Livelihood Vulnerability and Food Security amongst Smallholder Farmers in Papua New Guinea | Human Ecology | 2018 |
| 11 | V. Denman and K. Dewey | Food self-sufficiency in Micronesia. Effects of a nutrition assistance programme on food consumption | Food Policy | 1989 |
| 12 | G. Morren and D. Hyndman | The Taro Monoculture of Central New Guinea | Human Ecology | 1987 |
| 13 | G. Koczberski and G. Curry | Making a living: Land pressures and changing livelihood strategies among oil palm settlers in Papua New Guinea | Agricultural Systems | 2005 |
| 14 | Keen M. & Ride A. | Trading Places: Inclusive cities and market vending in the Pacific Islands | Asia Pacific Viewpoint | 2019 |
| 15 | M. Allen | Framing food security in the Pacific Islands: empirical evidence from an island in the Western Pacific | Regional Environmental Change | 2015 |
| 16 | B. Allen, M. Bourke and R. Hide | The sustainability of Papua New Guinea agricultural systems: the conceptual background. | Global Environmental Change | 1995 |
| 17 | G. Koczberski, G. Curry and V. Bue | 2012. Oil palm, food security and adaptation among smallholder households in Papua New Guinea. | Asia Pacific Viewpoint | 2012 |
| 18 | A. East and L. Dawes | Homegardening as a panacea: A case study of South Tarawa | Asia Pacific Viewpoint | 2009 |
| 19 | J. Connell | Food Security in the island Pacific?: Is Micronesia as far away as ever? | Regional Environmental Change | 2015 |
| 20 | A. McGregor et al. | Pacific island food security: situation, challenges and opportunities | Pacific Economic Bulletin | 2009 |
| 21 | Shaw B. | Pacific Agriculture: a retrospective of the 1980's and the prospects of 1990s | Pacific Economic Bulletin | 1992 |
| 22 | N. Georgeou. C. Hawksley and J. Monks | Food security in Solomon Islands:  Preliminary results from a survey of the Honiara Central Market | Pacific Dynamics | 2018 |
| 23 | C. Addinsall et al. | Agroecological tourism: bridging conservation, food security and tourism goals to enhance smallholders' livelihoods on South Pentecost, Vanuatu | Journal of Sustainable Tourism | 2017 |
| 24 | B. Allen | Boserup and Brookfield and the association between population density and agricultural intensity in Papua New Guinea | Asia Pacific Viewpoint | 2001 |
| 25 | M. Allen | Framing food security in the Pacific Islands: empirical evidence from an island in the Western Pacific | Regional Environmental Change | 2015 |
| 26 | J. Barnett | Dangerous climate change in the Pacific Islands: food production and food security | Regional Environmental Change | 2011 |
| 27 | D Cobon, et al. | Food shortages are associated with droughts, floods, frosts and ENSO in Papua New Guinea | Agricultural Systems | 2016 |
| 28 | N. Georgeou & C. Hawksley | Challenges for Sustainable Communities in Solomon Islands: Food Production, Market Sale and Livelihoods on Savo Island | Journal of Multidisciplinary International | 2017 |
| 29 | R. M. Bourke | *Taim hangre*: Variation in subsistence food supply in the Papua New Guinea highlands | Australian National University (PhD Thesis) | 1989 |
|  | | |  |  |
|  |  | Part B Grey Literature |  |  |
| **No.** | **Author** | **Title** | **Org/Journal** | **Year** |
| 1 | Asian Development Bank (ADB) and International Food Policy Research Institute (IFPI) | Climate Change, Food Security, and Socioeconomic Livelihood in Pacific Islands | ADB/IFPI | 2015 |
| 2 | ADB | Food security in Asia and the Pacific | ADB | 2013 |
| 3 | Hannah Jaenicke | Indigenous Agricultural Knowledge in the Pacific | SPC | 2011 |
| 4 | Food and Agriculture Organisation (FAO) | Climate Change and Food Security in the Pacific | FAO | 2009 |
| 5 | South Pacific Commission (SPC) | Smallholder Farming in Rural Development | SPC | 1983 |
| 6 | FAO | CLIMATE CHANGE AND FOOD SECURITY IN PACIFIC ISLAND COUNTRIES | FAO | 2008 |
| 7 | FAO (T. Martyn and S. Rogers) | Food Matters: policy measures for strengthening food and nutrition security in the Pacific Island Countries. | FAO | 2016 |
| 8 | FAO | Food Security and Nutrition in Small Island Developing States (SIDS) | FAO | 2016 |
| 9 | FAO | Pacific Multi-Country CPF Document: 2013 – 2017 | FAO | 2012 |
| 10 | ACIAR (G. Curry, M. Webb,  and G. Koczberski) | Improving Livelihoods of Smallholder Families through Increased Productivity of Coffee-based Farming Systems in the Highlands of PNG | ACIAR | 2017 |
| 11 | SPREP (Secretariat of the Pacific Regional Environment Program) | PACC Demonstration Guide: Piloting climate change adaptation in food production and food security on low-lying atolls of Solomon Islands | SPREP | 2015 |
| 12 | FAO | Sustainable livelihood strategies for conservation of biodiversity in Fiji, including potential crops and value adding opportunities in three FPAM project sites | FAO | 2017 |
| 13 | FAO | Developing the Knowledge, Skills and Talent of Youth to Further Food Security and Nutrition | FAO | 2015 |
| 14 | SARE (Sustainable Agriculture Research and Education) | On-Farm Implementation and Demonstration of Integrated Sustainable Agriculture and Livestock Production Systems for Small-Scale Farmers in Micronesia | SARE | 2011 |
| 15 | AusAid (F. Fleming and B. Mullen) | PHAMA (Impact Report) | AusAid | 2017 |
| 16 | FAO | Solomon Islands and FAO: Partnering to improve food security and income-earning opportunities | FAO | 2016 |
| 17 | ACIAR | Improving Livelihoods of Smallholder Families through Increased Productivity of Coffee-based Farming Systems in the Highlands of PNG | ACIAR | 2017 |
| 18 | Georgeou et al. | Food Security in Solomon Islands: A Survey of Honiara Central Market | HADRI/Western Sydney University | 2018 |
| 19 | K.L. Sharma | Food Security in the South Pacific Island Countries with Special Reference to the Fiji Islands | United Nations. UNU-WIDER | 2006 |
| 20 | FAO | Agriculture sector of Vanuatu severely damaged by tropical Cyclone Pam | FAO | 2015 |
