# Supplementary material for: Food security and small holder farming in Pacific Island countries and territories: A scoping review
Source: PLOS journal article supplement (doi:10.1371/journal.pstr.0000009), 2022-04-11
Supplement: S2 (10.1371/journal.pstr.0000009.s002) [file journal.pstr.0000009.s002]

S2 Appendix: Peer reviewed literature by main themes

| Smallholder farming and food security themes | | | | |
| --- | --- | --- | --- | --- |
| **Peer review study number** | **Community adaptation, resilience and crop diversification** | **Decreased availability of local foods and land** | **Changes in diet** | **Gender and agricultural production** |
|  |  | X | X |  |
|  | X |  | X |  |
|  | X |  |  |  |
|  |  | X |  |  |
|  | X |  |  |  |
|  | X |  |  | X |
|  | X |  | X | X |
|  | X |  |  |  |
|  | X |  |  | X |
|  | X |  |  | X |
|  | X | X |  |  |
|  | X |  | X |  |
|  | X |  |  | X |
|  | X |  |  | X |
|  | X |  | X |  |
|  | X | X | X | X |
|  | X | X | X | X |
|  | X | X | X |  |
|  | X | X | X |  |
|  | X |  | X |  |
|  | X |  |  |  |
|  | X |  | X | X |
|  | X |  |  |  |
|  |  | X |  |  |
|  | X |  | X | X |
|  |  | X | X |  |
|  | X |  |  |  |
|  | X |  |  | X |
|  | X |  |  |  |

| **Grey Lit** | **Smallholder farming and food security main themes** | | | |
| --- | --- | --- | --- | --- |
|  | **Community adaptation, resilience and crop diversification** | **Decreased availability of local foods and land** | **Changes in diet** | **Gender and agricultural production** |
|  |  | X |  |  |
|  |  | X |  |  |
|  | X |  |  |  |
|  | X |  | X |  |
|  | X |  |  |  |
|  | X | X | X |  |
|  | X |  | X |  |
|  | X |  |  |  |
|  |  | X | X |  |
|  | X |  |  | X |
|  |  | X |  |  |
|  | X | X |  |  |
|  | X | X |  |  |
|  | X |  |  |  |
|  | X |  |  |  |
|  | X |  |  |  |
|  | X |  |  | X |
|  | X |  | X | X |
|  |  | X | X |  |
|  | X |  |  |  |
